# Supplementary material for: Anandamide Reuptake Inhibitor (VDM11) as a Possible Candidate for COVID-19 Associated Depression; a Combination of Network Pharmacology, Molecular Docking and In Vivo Experimental Analysis
Source: MDPI journal article supplement (doi:10.3390/pr11010143), 2023-01-03
Supplement: s1 [file s1]

Archive with 1 entries (1 files):
- processes-2109455-supplementary.pdf
